# Supplementary figures and images for: Kinectin-mediated endoplasmic reticulum dynamics supports focal adhesion growth in the cellular lamella
Source: Oxford University Press journal article supplement (doi:10.1242/jcs.069153), 2010-10-27

**A**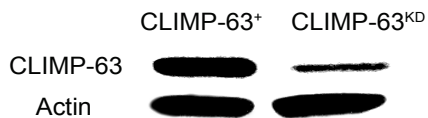**B**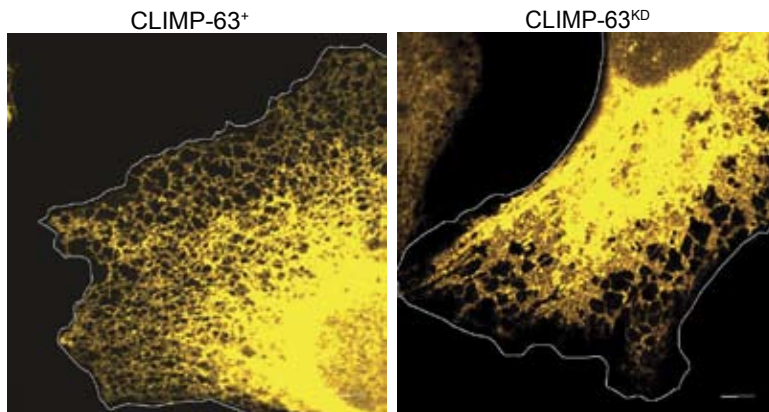**C**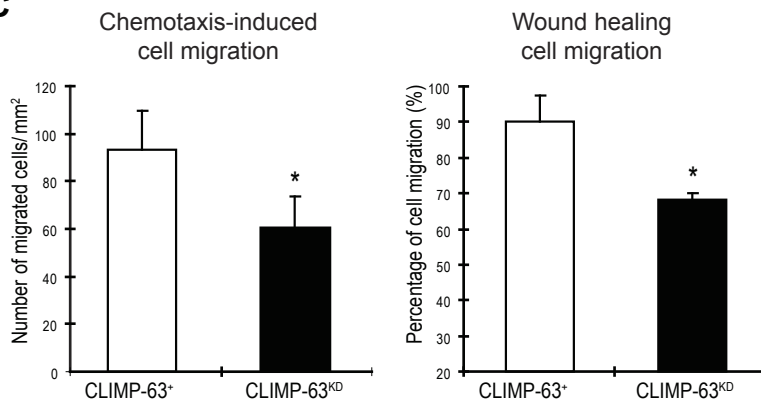

Supplement: jcs069153figs2.pdf [file jcs069153figs2.pdf]
